# Supplementary material
Source: PubMed Central journal article supplement (PMC3931082)
Supplement: supp_M113.528133_jbc.M113.528133-1.pdf [file supp_M113.528133_jbc.M113.528133-1.pdf]

Figure S1

**FIGURE S1: Sequence alignment of the GH62 subfamilies.** Subfamilies are numbered on the right hand side with the first representative of the family been *PaAbf62A* and *UmAbf62A* for subfamily 1 and 2, respectively. Secondary structure elements are represented in the top of the page. Um\_maydi stand for *Ustilago maydis*, and Po\_anser for *Podospora anserina*. Accession numbers are indicated for each protein. pSript was used to generate this picture (<http://esript.ibcp.fr/ESPrript/ESPrript>)(45).

Structural characterization of GH62  $\alpha$ -L-arabinofuranosidases

|                 |                     | $\beta$ 20 | $\beta$ 21    | $\eta$ 4      | $\beta$ 22 | $\eta$ 5 | $\beta$ 23    |              |              |
|-----------------|---------------------|------------|---------------|---------------|------------|----------|---------------|--------------|--------------|
| <i>Us_maydi</i> | EAK85571            | →          | →             | →             | →          | →        | →             |              |              |
| <i>Po_anser</i> | CAP62336            | →          | →             | →             | →          | →        | →             |              |              |
|                 | 3.2.1.55            | 279        | 289           | 299           | 309        | 319      | 329           |              |              |
| 1               | <i>Po_anser</i>     | CAP62336   | 3.2.1.55      | DEKLLIDPCN    | IRFMYQGM   | DPSA     | GG EYVHALPWR  | LGFIHNNPAC   |              |
|                 | <i>Am_medit</i>     | AEK42553   | DISHGEMIRAGT  | DOTLLTIDPCR   | IRVLYQGR   | DPAS     | GG DVNSLPWR   | LGLLTQTNATC  |              |
|                 | <i>Am_medit</i>     | ADJ45772   | DISHGEMIRAGT  | DOTLLTIDPCR   | IRVLYQGR   | DPAS     | GG DVNSLPWR   | LGLLTQTNATC  |              |
|                 | <i>Pi_indic</i>     | CCA70773   | DISHGEAIRTQV  | DOTMSISGCG    | IRVLYQGL   | APGS     | SG DVNSLPLA   | PPRSSHSDK... |              |
|                 | <i>Pi_indic</i>     | CCA70772   | DISHGEAIRDQV  | DOTMSLNGCG    | MRYLYQGL   | APGS     | SG DVNSLPWR   | LGLLTQTN.C   |              |
|                 | <i>Pi_indic</i>     | CCA70771   | DISHGEAIRSQV  | DOTMSISGCG    | IRVLYQGL   | APGS     | SG DVNSLPWR   | LGLLTQTN.C   |              |
|                 | un ACQ07729         |            | DISHGELIRTQT  | DOTMTISPCK    | LOVLYQGL   | SPSA     | GG DVLLPWK    | LGLLTQTNSAC  |              |
|                 | un ACQ05660         |            | DISHGEMVRSQV  | DOTMTISPCK    | LRVLYQGL   | SPTA     | TG DVNSLPWR   | LALLTQTNSAC  |              |
|                 | un_bacte            | AFY23018   | DISHGEMVIRAGT | DOMHEISSCR    | MOVLYQGM   | APGS     | GG DVHRLPWK   | LGLLTQTNSAC  |              |
|                 | <i>Co_clner</i>     | BAK14423   | 3.2.1.55      | DISHGELIRSGN  | DOTLIPSPCN | LRVLYQGL | DPNS          | GG DVNSLPWK  | LGLLTQTNSAC  |
|                 | <i>Ac_mirum</i>     | ACU37207   | DISHGELVRSGT  | DOTMEINPCK    | LSVLYQGL   | DPNA     | SG DVHRLPWK   | LGLLTQTNSPC  |              |
|                 | <i>St_bingc</i>     | AD113053   | DISHGELVRAGY  | DOTLTINPCK    | MOVLYQGM   | NPNA     | SG DVHRLPWK   | LGLLTQTNSCT  |              |
|                 | <i>Cl_sachc</i>     | AGF55270   | RVSHGELRSGI   | NOKLEINDINK   | VDFLIQGS   | TDMN     | V.AVEKKIWN    | LGIIKNYK...  |              |
|                 | <i>So_cellu</i>     | AGP41089   | RVSHGELIRAGV  | NOKLEINDINK   | VDFLIQGN   | LNLIS    | GP.PYQQLP     | WDLGVRINYAAG |              |
|                 | <i>Cl_cellu</i>     | ACL75596   | NVSHGELIRAGY  | NOKLEINDINK   | VDFLIQGT   | TNMM     | A.AEQ0IWD     | LDGLIRNYEGS  |              |
|                 | <i>Cl_cellu</i>     | ACL75590   | NVSHGELIRAGY  | NOKLEINDINK   | VDFLIQGT   | TNMM     | A.AEQ0IWD     | LDGLIRNYEGS  |              |
|                 | <i>Cl_BHL1100</i>   | AEV65176   | NVSHGELIRAGY  | NOKLEINDINK   | VDFLIQGT   | TDMS     | P.EYQ0IWN     | LDGLIRNY     |              |
|                 | <i>Cl_BHL1100</i>   | AEV65171   | NVSHGELIRAGY  | NOKLEINDINK   | VDFLIQGT   | TDMS     | P.EYQ0IWD     | LDGLIRNYTGSF |              |
|                 | <i>Te_turne</i>     | ACR14088   | QTSHGEMIRDGY  | DEKMLVLDPCN   | MOFLYQGV   | DLNG     | FNG.NVGERPYH  | IGVLKQK...   |              |
|                 | <i>So_cellu</i>     | CAN98023   | DISHGEMVRSQS  | DERMTINACN    | MOFLYQGR   | DPNA     | GG AVERLPYK   | LGLLITLTK... |              |
|                 | <i>So_cellu</i>     | CAN98020   | DISHGELIRSGH  | DEKMTIDPCD    | LRFLYQGR   | DPKW     | GG DVGKLPYR   | LGMLTLQK...  |              |
|                 | <i>Te_turne</i>     | ACR13062   | 3.2.1.55      | DISHGEMVRSAGH | DOFETIDPCN | LRFLYQGS | PPGS          | GG DVHRLPWK  | LGLLTQTNSAC  |
|                 | <i>So_cellu</i>     | CAN94755   | DISHGEMVRSAGH | DOFETIDPCN    | LRFLYQGR   | NPNA     | GG DVNSLPYR   | LGLLVNLN     |              |
|                 | <i>So_cellu</i>     | CAN94755   | DISHGELVRDGN  | DETATIDTCN    | LOFLYQGR   | NPSS     | GG EYVHALPWR  | LGLLKAVR...  |              |
|                 | <i>Op_terra</i>     | ACB73617   | DISHGELLRDGN  | DETMTLDPSR    | LYFLYQGR   | RRELTTP  | DP.SYDLPYQ    | LALLQSDR...  |              |
|                 | <i>Op_terra</i>     | ACB76517   | DISHGELLRDGN  | DETMTIDPDH    | LYFLYQGR   | GDAPA    | GT.EYVHALPWR  | LGLLQSTR...  |              |
|                 | <i>Am_medit</i>     | ADJ49532   | DISHGELIRITGY | DOTMEIDPCH    | LQLLYQGV   | NPNS     | TNVP.SYDLPYQ  | LGLLTQTN.PC  |              |
|                 | <i>Am_medit</i>     | AF081241   | DISHGELIRITGY | DOTMEIDPCH    | LQLLYQGV   | NPNS     | TNVP.SYDLPYQ  | LGLLTQTN.PC  |              |
|                 | <i>Le_macul</i>     | CBX95362   | STSHGELIRSDV  | DQKLIKPTSG    | IRFMYQGI   | DPAA     | SA.TYVHALPWR  | LGLLTQDA...  |              |
|                 | <i>St_viola</i>     | AEM84965   | DISHGELIRITGN | DOTMTINPCR    | QOFLYQGM   | NPSA     | GG DVNSLPWR   | LGLLTQTNATC  |              |
| 2               | <i>Us_maydi</i>     | EAK85571   | DISHGDLIRSNP  | DOTMTIDPCR    | LQLLYQGR   | DKNK     | VPPSSV        | DALPYR       | RGLLTYLGL... |
|                 | <i>Sp_reill</i>     | CB069122   | DISHGDLIRSNP  | DOTMTINPCR    | LQLLYQGR   | SPSA     | TTSNV         | DALPYR       | RGLLTLASA... |
|                 | <i>Po_anser</i>     | CAP65929   | DISHGDLVRSNA  | DOFETIDPCN    | LQLLYQGR   | SGMS     | NE.VYVHALPWR  | LGLLTLTN...  |              |
|                 | <i>Ma_oryza</i>     | EAA47906   | DISHGDLVRSNA  | DOFETIDPCN    | LQLLYQGR   | SPNA     | GG DVNSLPYR   | RGLLTLQ...   |              |
|                 | <i>Ma_oryza</i>     | EAA57262   | DISHGDLVRSNA  | DOFETIDPCN    | LQLLYQGR   | SPNA     | GG DVNSLPYR   | RGLLTLQ...   |              |
|                 | <i>Tr_aesti</i>     | ABT18331   | DISHGELVRTAN  | DOFETIDPCN    | LQLLYQGR   | NPSS     | NV.DYVHALPWR  | RGLLTLRR...  |              |
|                 | <i>Fu_grami</i>     | AAV66346   | DISHGELVRTSN  | DOFETIDPCN    | LQLLYQGR   | NPSS     | NV.DYVHALPWR  | RGLLTLRR...  |              |
|                 | <i>My_therm</i>     | AE060934   | DISHGDLIRIDA  | NHTMPVDPGR    | LQLLYQGR   | S.GD     | SA.DYVHALPWR  | RGLLTLQG...  |              |
|                 | <i>As_niger</i>     | CAA03159   | DISHGDLVRNPP  | DOTMTVDPCN    | LQLLYQGH   | DPNS     | GG DVNSLPWK   | PGVLTLLQ...  |              |
|                 | <i>As_tubin</i>     | CA801408   | 3.2.1.55      | DISHGDLVRNPP  | DOTMTVDPCN | LQLLYQGH | DPNS          | GG DVNSLPWK  | PGVLTLLQ...  |
|                 | <i>As_niger</i>     | CAA03158   | 3.2.1.55      | DISHGDLVRNPP  | DOTMTVDPCN | LQLLYQGH | DPNS          | GG DVNSLPWK  | PGVLTLLQ...  |
|                 | <i>As_niger</i>     | CAK38069   | 3.2.1.55      | DISHGDLVRNPP  | DOTMTVDPCN | LQLLYQGH | DPNS          | GG DVNSLPWK  | PGVLTLLQ...  |
|                 | <i>Pe_capsu</i>     | CAN07245   | 3.2.1.55      | DISHGDLVRSNP  | DOTMTIDPCN | LQLLYQGR | NPAA          | GG DVNSLPWK  | PGVLTLLN...  |
|                 | <i>Pe_chrysu</i>    | CAP86032   | DISHGDLVRSNP  | DOTMTIDPCN    | LQLLYQGR   | EPNA     | GG DVNSLPWK   | PAVLTLLKN... |              |
|                 | <i>Pe_chrysu</i>    | BA671682   | 3.2.1.55      | DISHGDLVRSNP  | DOTMTIDPCN | LQLLYQGR | EPNA          | GG DVNSLPWK  | PAVLTLLKN... |
|                 | <i>As_nidul</i>     | EAA59562   | 3.2.1.55      | DISHGDLVRSNP  | DOTMTIDPCN | LQLLYQGR | EPNA          | GG DVNSLPWK  | PAVLTLLKN... |
|                 | <i>As_nidul</i>     | EAA62979   | 3.2.1.55      | DISHGDLVRSNP  | DOTMTIDPCN | LQLLYQGR | EPNA          | GG DVNSLPWK  | PAVLTLLKN... |
|                 | <i>As_oryza</i>     | BAE62533   | DISHGDLVRSNP  | DOTMTVDPCN    | LQLLYQGR   | DPNA     | GG DVNSLPWK   | PGVLTLLQ...  |              |
|                 | <i>As_oryza</i>     | BAE62533   | DISHGDLVRSNP  | DOTMTVDPCN    | LQLLYQGR   | DPNA     | GG DVNSLPWK   | PGVLTLLQ...  |              |
|                 | <i>As_sojae</i>     | BA85252    | 3.2.1.55      | DISHGDLVRSNP  | DOTMTVDPCN | LQLLYQGR | DPNA          | GG DVNSLPWK  | PGVLTLLQ...  |
|                 | <i>Th_terra</i>     | AE070954   | DISHGDLIRSSA  | DOTMTIDPCN    | LQLLYQGR   | N.GS     | GS.TYDLPYR    | RGLLTLVG...  |              |
|                 | <i>Bo_fucke</i>     | CCD43598   | DISHGDLIRSSA  | DOTMTIDPCN    | LQLLYQGR   | NPSS     | NG.NYDTPYR    | RGVLTLLK...  |              |
|                 | <i>Bi_zeico</i>     | AA642252   | 3.2.1.55      | DISHGDLVRVNT  | DOTMTVDPCN | LQLLYQGR | APNS          | GG DVNSLPWK  | PGVLTLLK...  |
|                 | <i>Ma_oryza</i>     | EAA47965   | DISHGDLVRSNA  | DOFETIDPCN    | LQLLYQGR   | APNS     | GG DVNSLPWK   | PGVLTLLR...  |              |
|                 | <i>My_therm</i>     | AE059813   | DISHGELVRLSA  | DOTFTIDPCN    | LQLLYQGR   | DPSS     | GG DVNSLPWK   | PGVLTLLR...  |              |
|                 | <i>Ch_luckn</i>     | AED84983   | 3.2.1.55      | DISHGELVRLSA  | DOTFTIDPCN | LQLLYQGR | DPSS          | GG DVNSLPWK  | PGVLTLLR...  |
|                 | <i>Ac_N902-109</i>  | AGL18056   | DISHGELLRISA  | DOTNTIDPCN    | LQLLYQGR   | ATNS     | GG DVNSLPWK   | PGVLTLLR...  |              |
|                 | <i>Tr_reese</i>     | AAP57750   | 3.2.1.55      | DISHGDLIRSNP  | DOTMTIDPCN | LQLLYQGR | ATNS          | GG DVNSLPWK  | PGVLTLLR...  |
|                 | <i>St_scabi</i>     | CB669407   | DISHGDLVRSNP  | DOTMTIDPCN    | LQLLYQGR   | DPNA     | NDP.DYVHALPWR | RGVLTLLR...  |              |
|                 | <i>Am_medit</i>     | AEK41441   | DISHGDLVRTNP  | DOTKTVDPCH    | LQMLYQGR   | DPSS     | DGM.DYVHALPWR | RGVLTLLR...  |              |
|                 | <i>Am_medit</i>     | ADJ44701   | DISHGDLVRTNP  | DOTKTVDPCH    | LQMLYQGR   | DPSS     | DGM.DYVHALPWR | RGVLTLLR...  |              |
|                 | <i>Th_bispo</i>     | ADG88274   | DISHGDLVRTNP  | DOTKTVDPCH    | LQMLYQGR   | ATNS     | GG DVNSLPWK   | PGVLTLLR...  |              |
|                 | <i>St_venez</i>     | CCA60032   | DISHGDLVRTNP  | DOTKTVDPCH    | LQMLYQGR   | SPOA     | GG DVNSLPWK   | PGVLTLLR...  |              |
|                 | <i>St_venez</i>     | CCA60030   | DISHGELIRAGA  | DOTFTIDPCN    | LQLLYQGR   | DPNS     | GG DVNSLPWK   | PGVLTLLR...  |              |
|                 | <i>Ac_mirum</i>     | ACU38792   | DISHGDLVRQNP  | DOTKTVDPCH    | LQLLYQGR   | DPGA     | TG.DYVHALPWR  | RGVLTLLR...  |              |
|                 | <i>St_scabi</i>     | CB667595   | DISHGDLVRDNP  | DOTMTVDPCN    | LRLLYQGL   | SPGTPSNT | PYVHALPWR     | RGVLTLLR...  |              |
|                 | <i>St_davaw</i>     | CCK27713   | DISHGDLVRNPP  | DOTMTIDPCN    | LQLLYQGL   | STTTPSGT | PYVHALPWR     | RGVLTLLR...  |              |
|                 | <i>Mi_auran</i>     | ADL45228   | DISHGDLVRTNP  | DOTKTVDPCH    | LQLLYQGR   | NPAA     | GG DVNSLPWK   | PGVLTLLR...  |              |
|                 | <i>Mi_L5</i>        | ADU07461   | DISHGDLVRTNP  | DOTKTVDPCH    | LQLLYQGR   | NPAA     | GG DVNSLPWK   | PGVLTLLR...  |              |
|                 | <i>Ac_S50/110</i>   | AEV83900   | DISHGDLVRNPP  | DOTMTVDPCN    | LQLLYQGR   | NPAA     | GG DVNSLPWK   | PGVLTLLR...  |              |
|                 | <i>Ac_N902-109</i>  | AGL16784   | DISHGDLVRTNP  | DOTKTVDPCH    | LQLLYQGR   | NPAA     | GG DVNSLPWK   | PGVLTLLR...  |              |
|                 | <i>Ac_S50/110</i>   | AEV83930   | DISHGDLVRNPP  | DOTMTVDPCN    | LQLLYQGR   | NPAA     | GG DVNSLPWK   | PGVLTLLR...  |              |
|                 | <i>St_chatt</i>     | AAD32559   | 3.2.1.55      | DISHGDLVRNPP  | DOTMTIDPCN | LQLLYQGR | SPMTFPGT      | SYDNLPTG     | ILTLKR...    |
|                 | <i>St_davaw</i>     | CCK27711   | DISHGDLVRNPP  | DOTMTIDPCN    | LQLLYQGR   | SPMTFPGT | SYDNLPTG      | ILTLKR...    |              |
|                 | <i>Am_medit</i>     | ADJ46583   | DISHGDLVRTNP  | DOTKTVDPCH    | LQLLYQGR   | DPSS     | GG DVNSLPWK   | PGVLTLLR...  |              |
|                 | <i>Am_medit</i>     | AEK43384   | DISHGDLVRTNP  | DOTKTVDPCH    | LQLLYQGR   | DPSS     | GG DVNSLPWK   | PGVLTLLR...  |              |
|                 | <i>Ca_acidi</i>     | ACU37344   | DISHGDLVRNPP  | DOTMTIDPCN    | LQLLYQGR   | DPSS     | GG DVNSLPWK   | PGVLTLLR...  |              |
|                 | <i>Ki_setae</i>     | BAJ33148   | DISHGDLVRNPP  | DOTMTIDPCN    | LQLLYQGR   | SPTA     | TG.SYDLPYR    | RGVLTLLQ...  |              |
|                 | <i>St_scabi</i>     | CBG75744   | DISHGDLVRNPP  | DOTMTIDPCN    | LQLLYQGR   | SPSA     | GG DVNSLPWK   | PGVLTLLR...  |              |
|                 | <i>St_lvivid</i>    | AA26524    | 3.2.1.55      | DISHGDLVRDNP  | DOTMTVDPCN | LQLLYQGR | APNA          | GG DVNSLPWK  | PGVLTLLR...  |
|                 | <i>St_coeli</i>     | CAA16189   | DISHGDLVRDNP  | DOTMTVDPCN    | LQLLYQGR   | SPNA     | GG DVNSLPWK   | PGVLTLLR...  |              |
|                 | <i>St_davaw</i>     | CCK24720   | DISHGDLVRNPP  | DOTMTIDPCN    | LQLLYQGR   | SPTA     | GG DVNSLPWK   | PGVLTLLR...  |              |
|                 | <i>St_argen</i>     | AGU42410   | DISHGDLVRDNP  | DOTMTIDPCN    | LQLLYQGR   | DPAA     | GG DVNSLPWK   | PGVLTLLR...  |              |
|                 | <i>St_rapam</i>     | AGP52116   | DISHGDLVRNPP  | DOTMTIDPCN    | LQLLYQGR   | SPSA     | GG DVNSLPWK   | PGVLTLLR...  |              |
|                 | <i>St_hygro</i>     | AEV86327   | DISHGDLVRNPP  | DOTMTIDPCN    | LQLLYQGR   | SPSA     | GG DVNSLPWK   | PGVLTLLR...  |              |
|                 | <i>St_hygro</i>     | AGF60549   | DISHGDLVRNPP  | DOTMTIDPCN    | LQLLYQGR   | SPSA     | GG DVNSLPWK   | PGVLTLLR...  |              |
|                 | <i>Th_terra</i>     | AE064662   | DISHGDLVRTNP  | DOTKTVDPCH    | LQLLYQGR   | APNS     | GG DVNSLPWK   | PGVLTLLR...  |              |
|                 | <i>No_dasso</i>     | ADH68352   | DISHGELIRVTA  | DOTMTVDACD    | MRFYQGR    | SPGS     | GG DVNSLPWK   | PGVLTLLR...  |              |
|                 | <i>Ac_S50/110</i>   | AEV83898   | DISHGELVRTNP  | DOTMTVDPCN    | LQLLYQGR   | SPSS     | GG DVNSLPWK   | PGVLTLLR...  |              |
|                 | <i>C_gilvu</i>      | AEI13179   | DISHGELLRISA  | DOTMTVDPCN    | LQLLYQGR   | SPSS     | GG DVNSLPWK   | PGVLTLLR...  |              |
|                 | <i>C_fimi</i>       | AE47269    | DISHGELIRISA  | DOTMTIDPCN    | LQLLYQGR   | SPSS     | GG DVNSLPWK   | PGVLTLLR...  |              |
|                 | <i>St_therm</i>     | BAB84113   | 3.2.1.55      | DISHGELIRISA  | DOTMTVDPCN | LQLLYQGR | DPSS          | GG DVNSLPWK  | PGVLTLLR...  |
|                 | <i>Ce_flavi</i>     | ADG75907   | DISHGELLRISA  | DOTMTVDPCN    | LQLLYQGR   | SPQS     | GG DVNSLPWK   | PGVLTLLR...  |              |
|                 | <i>Ce_flavi</i>     | ADG75732   | DISHGELLRISA  | DOTMTVDPCN    | LQLLYQGR   | SPQS     | GG DVNSLPWK   | PGVLTLLR...  |              |
|                 | <i>Ve_maris</i>     | AE847822   | DISHGELIRISA  | DOTMTVDPCN    | LQLLYQGR   | SPNS     | GG DVNSLPWK   | PGVLTLLR...  |              |
|                 | <i>Ve_maris</i>     | AE847440   | DISHGELIRISA  | DOTMTVDPCN    | LQLLYQGR   | APNS     | GG DVNSLPWK   | PGVLTLLR...  |              |
|                 | <i>Ve_maris</i>     | AE847815   | DISHGELIRISA  | DOTMTVDPCN    | LQLLYQGR   | APNS     | GG DVNSLPWK   | PGVLTLLR...  |              |
|                 | <i>St_scabi</i>     | CBG74885   | DISHGELLRISA  | DOTMTVDPCN    | LQLLYQGR   | SPGS     | GG DVNSLPWK   | PGVLTLLR...  |              |
|                 | <i>Ac_N902-109</i>  | AGL19117   | DISHGELVRTSA  | DOTMTVDPCN    | LQLLYQGR   | SPNS     | GG DVNSLPWK   | PGVLTLLR...  |              |
|                 | <i>St_bingc</i>     | AD106184   | DISHGELIRITSP | DOTMTVDPCN    | LQLLYQGR   | SPNS     | GG DVNSLPWK   | PGVLTLLR...  |              |
|                 | <i>St_flavo</i>     | ADN07591   | DISHGELLRISA  | DOTMTVDPCN    | LQLLYQGR   | SPNS     | GG DVNSLPWK   | PGVLTLLR...  |              |
|                 | <i>St_PAMC26508</i> | AGJ52854   | DISHGELLRISA  | DOTMTVDPCN    | LQLLYQGR   | SPNS     | GG DVNSLPWK   | PGVLTLLR...  |              |
|                 | <i>Ac_misso</i>     | BAL88054   | DISHGELIRVTA  | DOTMTVDPCN    | LQLLYQGR   | SPNS     | GG DVNSLPWK   | PGVLTLLR...  |              |
|                 | <i>Mi_auran</i>     | ADL49492   | DISHGELIRITTA | DOTFTVDPCN    | LQLLYQGR   | SPNS     | GG DVNSLPWK   | PGVLTLLR...  |              |
|                 | <i>Mi_L5</i>        | ADU11518   | DISHGELIRITTA | DOTFTVDPCN    | LQLLYQGR   | SPNS     | GG DVNSLPWK   | PGVLTLLR...  |              |
|                 | <i>Mi_auran</i>     | ADL46532   | DISHGELIRITTA | DOTFTVDPCN    | LQLLYQGR   | SPNS     | GG DVNSLPWK   | PGVLTLLR...  |              |
|                 | <i>Mi_L5</i>        | ADU10857   | DISHGELIRITTA | DOTFTVDPCN    | LQLLYQGR   | SPNS     | GG DVNSLPWK   | PGVLTLLR...  |              |

Structural characterization of GH62  $\alpha$ -L-arabinofuranosidases

|                                     |                     | $\beta$ 1  |            | $\beta$ 2    |            | $\beta$ 3   |              |           |
|-------------------------------------|---------------------|------------|------------|--------------|------------|-------------|--------------|-----------|
|                                     |                     | 1          | 10         | 20           | 30         | 40          | 50           |           |
| <i>Us_maydi</i> EAK85571            |                     | LSNQPPSDLP | TTTQWITSTG | PLV          | GPKN.DGRGI | AGIKDPTIIL  | INGTHHVF     |           |
| <i>Po_anser</i> CAP62336   3.2.1.55 |                     | LSNQPPSDLP | TTTQWITSTG | PLV          | GPKN.DGRGI | AGIKDPTIIL  | INGTHHVF     |           |
| Am_medit                            | AEK42553            | TLP        | SRYSSSSG   | PLI          | APKSDATHDI | AGIKDPTIVVY | ADGKYHVF     |           |
| Am_medit                            | ADJ45772            | TLP        | SRYSSSSG   | PLI          | APKSDATHDI | AGIKDPTIVVY | ADGKYHVF     |           |
| P1_indic                            | CCA70773            | TLP        | SSFRSSSG   | ALV          | SPKN.DSRNI | KGIKDP      | SIIVYNGKYHVF |           |
| P1_indic                            | CCA70772            | TLP        | SSFRSSSG   | ALV          | SPKN.DSRNI | KGIKDP      | SIIVYNGKYHVF |           |
| P1_indic                            | CCA70771            | TLP        | SSFRSSSG   | ALV          | SPKN.DSRNI | KGIKDP      | SIIVYNGKYHVF |           |
| un AC007729                         |                     | TLP        | SSFRSSSG   | PLV          | EPKN.DGRNI | AGIKDPTIVK  | VDCTYHVF     |           |
| un AC005660                         |                     | ATGSLP     | TSFRSSSTN  | ALV          | GPKN.DGRNL | AGIKDPTIIE  | VDGTYHVF     |           |
| un_bacte                            | AFY23018            | ALP        | SSFRSSSG   | VLI          | SPKSDATHNI | LAVKDP      | ITVVRHNR     |           |
| Co_ciner                            | BAK14423   3.2.1.55 | PAPAPSGKLP | SSFRSSSG   | PLI          | GPKS.DSRRI | QGIKDP      | SIIVYHDGR    |           |
| Ac_mirum                            | ACU37207            | GSLP       | SSFRSSSG   | ALI          | GPKPDSSHAT | IVSKDP      | SIIVRHNGR    |           |
| St_bingc                            | ADI13053            | ALP        | GSFSSSSG   | ILM          | SPKPDSTHNI | AGLKDPTIVVY | YNGKYHVF     |           |
| Cl_sacch                            | AGF55270            | AANP       | NPTIQV     | G.SVCFYNGPTN | AWDA       | VSVKDP      | SIIVYANGKYH  |           |
| So_cellu                            | AGP41089            | AATA       | NPTIYVDA   | PIL          | YKAKAEPYDH | YAVKDP      | ITIVYSGGKYH  |           |
| Cl_cellu                            | ACL75596            | AANP       | NPSWVDE    | RVI          | FHQCCSPYDY | YAAKDP      | ITIVYNGKYLV  |           |
| Cl_cellu                            | ACL75590            | AANP       | NPSWVDE    | RVI          | FHQCCSPYDY | YAAKDP      | ITIVYNGKYLV  |           |
| Cl_BNL1100                          | AEY65176            | AANP       | NPSWVDE    | RVI          | FHQCCSPYDY | YAAKDP      | ITIVYNGKYLV  |           |
| Cl_BNL1100                          | AEY65171            | AANP       | NPSWVDE    | RVI          | FHQCCSPYDY | YAAKDP      | ITIVYNGKYLV  |           |
| Te_turne                            | ACR14088            | CGNNTAAP   | LISWTSAG   | PLI          | SPKE       | FVAKDP      | ITIVYNNQYH   |           |
| So_cellu                            | CAN98023            | TCDLPL     | TSFRSSSG   | PVI          | NPKSAAGNF  | VSFKDP      | ITIVPQKGYH   |           |
| So_cellu                            | CAN98020            | PTCDLPL    | TSFRSSSG   | PVI          | NPKSAAGNF  | VSFKDP      | ITIVPQKGYH   |           |
| Ce_japon                            | ACE85320   3.2.1.55 | CELK       | APLRITSTG  | PLI          | SPKN       | ISIKDP      | SIIVKYNDR    |           |
| Te_turne                            | ACR13064            | ELP        | GQLSITSTS  | PVI          | APAO       | SSW         | ASVKDP       | SIIVRYNDR |
| So_cellu                            | CAN94755            | CGLP       | TSFRSSSG   | ALV          | SPKSDATHNI | IVSKDP      | ITVVFNDR     |           |
| Op_terra                            | ACB73617            | DGLT       | GPFFITSTA  | PLI          | APVADATHPI | IVSKDP      | ITIVYHNGK    |           |
| Op_terra                            | ACB76517            | IAALAP     | FAMITSTG   | PLI          | SPVSDTTHSI | IVAKDP      | ITIVYNGK     |           |
| Am_medit                            | ADJ49532            | NLP        | SSFRITDQG  | PLI          | SAKPVSGHNI | IVSKDP      | SIIVRYNG     |           |
| Am_medit                            | AF081241            | NLP        | SSFRITDQG  | PLI          | SAKPVSGHNI | IVSKDP      | SIIVRYNG     |           |
| Le_macul                            | CBX95362            | PLP        | RNFSSSSN   | VLV          | TPKN.DDRNV | AGIKDPTIIO  | HNGKYHVF     |           |
| St_viola                            | AEM84965            | QLP        | GSFQSSSG   | QLI          | APKPDASHPV | IVSKDP      | ITIVQADG     |           |
| 2 Us_maydi                          | EAK85571            | ALP        | TTYRTSSA   | PLA          | QPKD       | GW          | VSFKDP       | ITIVPYNG  |
| Sp_relli                            | CBQ69122            | ALP        | TTYRTSSA   | PLA          | QPKD       | GW          | VSFKDP       | ITIVPYNG  |
| Po_anser                            | CAP59529            | PGADAACSPL | TSYRWRDSC  | ILA          | QPKS       | GW          | VSFKDP       | ITIVPQK   |
| Ma_oryza                            | EAA47906            | QCTLPL     | TSYRWRDSC  | ILA          | QPKS       | GW          | VSFKDP       | ITIVPQK   |
| Ma_oryza                            | EAA37262            | QCTLPL     | TSYRWRDSC  | ILA          | QPKS       | GW          | VSFKDP       | ITIVPQK   |
| Tr_aesti                            | ABT18331            | AQCSLPL    | TSYRTSSG   | PLA          | QPKD       | GW          | VSFKDP       | ITIVAPYNG |
| Fu_grami                            | AAV66346            | QCALP      | TSYRTSSG   | PLA          | QPKS       | PF          | KNLKD        | ITIVAPYNG |
| My_therm                            | AE060934            | SLP        | SSYRTSTG   | ALA          | QPKS       | GW          | ANLKD        | ITIVPYNG  |
| As_niger                            | CAA03159            | KCALP      | SSYRTSTG   | ALA          | TPKS       | GW          | TALKD        | ITIVVSDG  |
| As_tubin                            | CAB01408   3.2.1.55 | KCALP      | SSYRTSTG   | ALA          | TPKS       | GW          | TALKD        | ITIVVSDG  |
| As_niger                            | CAA03158   3.2.1.55 | KCALP      | SSYRTSTG   | ALA          | TPKS       | GW          | TALKD        | ITIVVSDG  |
| As_niger                            | CAK38069   3.2.1.55 | KCALP      | SSYRTSTG   | ALA          | TPKS       | GW          | TALKD        | ITIVVSDG  |
| Pe_capsu                            | CAM07245   3.2.1.55 | NCALP      | STYSRTSTG  | ALA          | NPKP       | GW          | TALKD        | ITIVVSDG  |
| Pe_chrys                            | CAP86032            | ALP        | STYSRTSTG  | ALA          | NPKS       | GW          | VALKD        | ITIVVSDG  |
| Pe_chrys                            | BAG11682   3.2.1.55 | DCALP      | STYSRTSTG  | ALA          | NPKS       | GW          | VALKD        | ITIVVSDG  |
| As_nidul                            | EAA59562   3.2.1.55 | QCGLP      | STYSRTSTG  | PLA          | EPKD       | GW          | ASLKD        | ITIVAPYNG |
| As_nidul                            | EAA62979            | QCGLP      | STYSRTSTG  | PLA          | EPKD       | GW          | ASLKD        | ITIVAPYNG |
| As_oryza                            | BAE62533            | QCGLP      | SSYRTSTG   | ALA          | EPKA       | GW          | ASLKD        | ITIVVSDG  |
| As_oryza                            | BAE85252   3.2.1.55 | QCGLP      | SSYRTSTG   | ALA          | EPKA       | GW          | ASLKD        | ITIVVSDG  |
| Th_erre                             | AE070954            | ALP        | SSYRTSTG   | ALA          | TPKS       | GW          | VSFKD        | ITIVPQK   |
| Bo_fucke                            | CDC43598            | ACALP      | SKYSRTSTG  | ALA          | TPKS       | GW          | ASLKD        | ITIVVSDG  |
| Bi_zeico                            | AAG42252   3.2.1.55 | QSCKLP     | TSYRTSSG   | ALA          | QPKS       | GW          | ANLKD        | ITIVVSDG  |
| Ma_oryza                            | EAA47965            | ALP        | STYRTSSG   | ALA          | QPKN       | GW          | ASLKD        | ITIVANNGR |
| My_therm                            | AE059813            | QSCCLP     | SSYRTSTG   | ALA          | QPKS       | PW          | VSFKD        | ITIVPQK   |
| ChLuckn                             | AED84983   3.2.1.55 | QSCCLP     | SSYRTSTG   | ALA          | QPKS       | PW          | VSFKD        | ITIVPQK   |
| Ac_N902-109                         | AGL18056            | CALP       | TSYRTSTG   | PLA          | QPKS       | GW          | ASLKD        | ITIVAPYNG |
| Tr_reese                            | AAP57750   3.2.1.55 | APATCTLP   | TSYRTSTG   | ALA          | SPKS       | GW          | VSFKD        | ITIVVSDG  |
| St_scabi                            | CBG69407            | NCSCLP     | TSYRTSTG   | PLA          | QPKN       | GW          | VSFKD        | ITIVVSDG  |
| Am_medit                            | AEK41441            | ATCTLP     | TSYRTSTG   | PLA          | NPKS       | GW          | VALKD        | ITIVVSDG  |
| Am_medit                            | ADJ44701            | ATCTLP     | TSYRTSTG   | PLA          | NPKS       | GW          | VALKD        | ITIVVSDG  |
| Th_bispo                            | ADG88274            | VTCCLP     | TSYRTSTG   | PLA          | NPKS       | GW          | VSFKD        | ITIVVSDG  |
| St_venez                            | CA60032             | CMLP       | TSYRTSTG   | ALA          | QPKA       | GW          | ASLKD        | ITIVVSDG  |
| St_venez                            | CA60030             | ALP        | SSYRTSTG   | ALA          | EPKA       | GW          | ASLKD        | ITIVVSDG  |
| Ac_mirum                            | ACU38792            | CMLP       | SSYRTSTG   | ALA          | NPKS       | GW          | LALKD        | ITIVVSDG  |
| St_scabi                            | CBG67595            | TLP        | TSYRTSTG   | PLA          | QPKN       | GW          | VSFKD        | ITIVVSDG  |
| St_davaw                            | CCK27713            | ALP        | TSYRTSTG   | PLA          | QPKN       | GW          | VSFKD        | ITIVVSDG  |
| Mi_auran                            | ADL45228            | ALP        | TSYRTSTG   | ALA          | NPKN       | GW          | VSFKD        | ITIVVSDG  |
| Mi_L5 ADU07461                      |                     | ALP        | TSYRTSTG   | ALA          | NPKN       | GW          | VSFKD        | ITIVVSDG  |
| Ac_SE50/110                         | AEV83900            | CTLP       | TSYRTSTG   | ALA          | QPKS       | GW          | VALKD        | ITIVVSDG  |
| Ac_N902-109                         | AGL16784            | CTLP       | SSYRTSTG   | ALA          | TPKN       | GW          | TSFKD        | ITIVVSDG  |
| Ac_SE50/110                         | AEV85830            | TLP        | SSYRTSTG   | ALA          | QPKN       | GW          | TSFKD        | ITIVVSDG  |
| St_chatt                            | AAD32559   3.2.1.55 | APKSDTCLP  | TSYRTSTG   | PLA          | QPKN       | GW          | ASLKD        | ITIVVSDG  |
| St_davaw                            | CCK27711            | ALP        | TSYRTSTG   | PLA          | QPKN       | GW          | ASLKD        | ITIVVSDG  |
| Am_medit                            | ADJ46583            | CTLP       | SSYRTSSG   | ALA          | QPKN       | GW          | LSLKD        | ITIVVSDG  |
| Am_medit                            | AEK43384            | CTLP       | SSYRTSSG   | ALA          | QPKN       | GW          | LSLKD        | ITIVVSDG  |
| Ca_acidi                            | ACU73744            | SLP        | STYRTSTG   | ALA          | TPQN       | GW          | VSFKD        | ITIVVSDG  |
| Kl_setae                            | BAJ33148            | CMLP       | TSYRTSTG   | ALA          | QPKN       | GW          | ASVKD        | ITIVVSDG  |
| St_scabi                            | CBG75744            | ALP        | TSYRTSTG   | PLA          | QPKN       | GW          | ASVKD        | ITIVVSDG  |
| St_livid                            | AAC26524   3.2.1.55 | TDGTCLP    | TSYRTSTG   | VLA          | QPKS       | GW          | VALKD        | ITIVVSDG  |
| St_coeli                            | CAA16189            | PPTDGTCLP  | TSYRTSTG   | VLA          | QPKS       | GW          | VALKD        | ITIVVSDG  |
| St_davaw                            | CCK24720            | GTCCLP     | TSYRTSTG   | VLA          | QPKN       | GW          | ASVKD        | ITIVVSDG  |
| St_argen                            | AGU42410            | ALP        | TSYRTSTG   | VLA          | QPKN       | GW          | LALKD        | ITIVVSDG  |
| St_rapam                            | AGP52116            | ATSACSLP   | TSYRTSTG   | VLA          | QPKN       | GW          | VSFKD        | ITIVVSDG  |
| St_hygro                            | AEY86327            | SLP        | TSYRTSTG   | ALA          | QPKN       | GW          | VSFKD        | ITIVVSDG  |
| St_hygro                            | AGF60549            | SLP        | TSYRTSTG   | ALA          | QPKN       | GW          | VSFKD        | ITIVVSDG  |
| Th_erre                             | AE064662            | DLP        | TTYKWTSTG  | ALA          | QPKN       | GW          | TSFKD        | ITIVVSDG  |
| No_dasso                            | ADH68352            | CALP       | SSYRTSTG   | PLA          | QPKP       | GW          | ASLKD        | ITIVVSDG  |
| Ac_SE50/110                         | AEV83898            | ALP        | SSYRTSTG   | ALA          | TPKS       | GR          | VALKD        | ITIVVSDG  |
| [C_gilvu]                           | AEI13179            | QLP        | SSYRTSTG   | ALA          | NPKS       | GW          | ASLKD        | ITIVVSDG  |
| Ce_fiml                             | AE47269             | CMLP       | TSYRTSTG   | ALA          | QPKS       | GW          | ASLKD        | ITIVVSDG  |
| St_therm                            | BAB84113   3.2.1.55 | CELPL      | TSYRTSTG   | ALA          | QPKS       | GW          | VSFKD        | ITIVVSDG  |
| Ce_flavi                            | ADG75907            | CELPL      | TSYRTSTG   | VLA          | QPKS       | GW          | VSFKD        | ITIVVSDG  |
| Ce_flavi                            | ADG75732            | NLP        | SSYRTSSG   | VLA          | QPKS       | GW          | VSFKD        | ITIVVSDG  |
| Ve_maris                            | AEB47822            | DLP        | SSYRTSSG   | VLA          | QPKS       | GW          | VSFKD        | ITIVVSDG  |
| Ve_maris                            | AEB47470            | CNLP       | SSYRTSSG   | VLA          | QPKS       | GW          | VSFKD        | ITIVVSDG  |
| Ve_maris                            | AEB47815            | CNLP       | SSYRTSSG   | VLA          | QPKS       | GW          | VSFKD        | ITIVVSDG  |
| St_scabi                            | CBG74885            | DLP        | SSYRTSSG   | VLA          | QPKS       | GW          | VSFKD        | ITIVVSDG  |
| Ac_N902-109                         | AGL19117            | TLP        | SSYRTSTG   | ALA          | TPRS       | GW          | VSFKD        | ITIVVSDG  |
| St_bingc                            | ADI06184            | DLP        | TSYRTSTG   | ALA          | QPKP       | GW          | VSFKD        | ITIVVSDG  |
| St_flavo                            | ADW07591            | DLP        | SAYRTSTG   | ALA          | QPKQ       | GW          | VSFKD        | ITIVVSDG  |
| St_PAMC26508                        | AGJ52854            | SCDLP      | SAYRTSTG   | ALA          | QPKQ       | GW          | VSFKD        | ITIVVSDG  |
| Ac_misso                            | BAL88054            | SLP        | TSYRTSTG   | ALA          | QPKS       | GW          | VSFKD        | ITIVVSDG  |
| Mi_auran                            | ADL49492            | CNLP       | SSYRTSSG   | VLA          | QPKS       | GW          | VSFKD        | ITIVVSDG  |
| Mi_L5 ADU11518                      |                     | CNLP       | SSYRTSSG   | VLA          | QPKS       | GW          | VSFKD        | ITIVVSDG  |
| Mi_auran                            | ADL46532            | CNLP       | SSYRTSSG   | VLA          | QPKS       | GW          | VSFKD        | ITIVVSDG  |
| Mi_L5 ADU10857                      |                     | CNLP       | SSYRTSSG   | VLA          | QPKS       | GW          | VSFKD        | ITIVVSDG  |

Structural characterization of GH62  $\alpha$ -L-arabinofuranosidases

| Accession       | Gene               | Strain   | Protein  | β4   | η1   | β5 | β6 | η2  | β7  |   |   |   |   |   |   |   |   |   |   |   |   |   |   |   |   |   |   |   |   |   |   |   |   |   |   |   |   |   |   |   |   |   |   |   |   |   |   |   |   |   |   |   |   |   |   |   |   |   |   |   |
|-----------------|--------------------|----------|----------|------|------|----|----|-----|-----|---|---|---|---|---|---|---|---|---|---|---|---|---|---|---|---|---|---|---|---|---|---|---|---|---|---|---|---|---|---|---|---|---|---|---|---|---|---|---|---|---|---|---|---|---|---|---|---|---|---|---|
| <i>Us maydi</i> | EAK85571           |          | ...      | →    | →    | →  | →  | →   | →   |   |   |   |   |   |   |   |   |   |   |   |   |   |   |   |   |   |   |   |   |   |   |   |   |   |   |   |   |   |   |   |   |   |   |   |   |   |   |   |   |   |   |   |   |   |   |   |   |   |   |   |
| <i>Po_anser</i> | CAP62336           | 3.2.1.55 | ...      | →    | →    | →  | →  | →   | →   |   |   |   |   |   |   |   |   |   |   |   |   |   |   |   |   |   |   |   |   |   |   |   |   |   |   |   |   |   |   |   |   |   |   |   |   |   |   |   |   |   |   |   |   |   |   |   |   |   |   |   |
|                 |                    |          |          | 60   | 70   | 80 | 90 | 100 | 110 |   |   |   |   |   |   |   |   |   |   |   |   |   |   |   |   |   |   |   |   |   |   |   |   |   |   |   |   |   |   |   |   |   |   |   |   |   |   |   |   |   |   |   |   |   |   |   |   |   |   |   |
| 1               | <i>Po_anser</i>    | CAP62336 | 3.2.1.55 | ...Q | SAGY | N  | L  | V   | V   | F | F | T | A | D | A | D | A | P | N | A | T | F | F | Y | L | D | D | Q | A | P | L | G | T | G | Y | R | A | A | P | Q | V | F | F | F | A | P | K | L | N | Y | L | V | V | Q | . | N | G |   |   |   |
|                 | <i>Am_medit</i>    | AEK42553 |          | ...N | AAGY | N  | L  | V   | V   | L | S | F | T | D | W | A | Q | A | G | S | A | T | Q | Y | L | D | D | Q | S | G | . | I | G | T | G | Y | R | A | A | P | E | V | F | F | F | A | P | O | K | L | N | Y | L | V | V | Q | . | D | G |   |
|                 | <i>Am_medit</i>    | ADJ45772 |          | ...N | AAGY | N  | L  | V   | V   | L | S | F | T | D | W | A | Q | A | G | S | A | T | Q | Y | L | D | D | Q | S | G | . | I | G | T | G | Y | R | A | A | P | E | V | F | F | F | A | P | O | K | L | N | Y | L | V | V | Q | . | D | G |   |
|                 | <i>Pi_indic</i>    | CCA70773 |          | ...V | ASGY | N  | L  | V   | V   | F | S | F | T | D | W | A | Q | A | G | S | A | T | F | F | Y | L | D | D | Q | T | P | . | I | G | S | G | Y | R | A | A | P | Q | V | F | F | F | A | P | O | N | R | N | Y | L | V | V | Q | . | N | G |
|                 | <i>Pi_indic</i>    | CCA70772 |          | ...V | ASGY | N  | L  | V   | V   | F | S | F | T | D | W | A | Q | A | G | S | A | T | F | F | Y | L | D | D | Q | T | P | . | I | G | S | G | Y | R | A | A | P | Q | V | F | F | F | A | P | O | N | R | N | Y | L | V | V | Q | . | N | G |
|                 | <i>Pi_indic</i>    | CCA70771 |          | ...V | ASGY | N  | L  | V   | V   | F | S | F | T | D | W | A | Q | A | G | S | A | T | F | F | Y | L | D | D | Q | T | P | . | I | G | S | G | Y | R | A | A | P | Q | V | F | F | F | A | P | O | N | R | N | Y | L | V | V | Q | . | N | G |
|                 | <i>un AC007729</i> |          |          | ...T | KSGY | N  | L  | V   | V   | F | N | F | K | D | F | S | Q | A | N | A | T | F | F | Y | L | D | D | Q | T | P | . | I | G | S | G | Y | R | A | A | P | Q | V | F | F | F | K | P | H | N | L | N | Y | L | V | F | Q | . | N | G |   |
|                 | <i>un AC005660</i> |          |          | ...Q | ASGY | N  | L  | V   | V   | F | N | F | T | D | F | N | Q | A | G | N | A | P | F | F | Y | L | D | D | Q | S | G | . | I | G | T | G | Y | R | A | A | P | Q | V | F | F | F | Q | P | H | L | N | Y | L | V | F | Q | . | N | G |   |
|                 | <i>un_bacte</i>    | AFY23018 |          | ...N | SAGY | N  | M  | M   | T   | T | S | F | G | D | W | S | Q | A | A | S | A | P | H | F | L | D | R | S | G | . | I | G | A | G | Y | R | A | A | P | Q | V | F | F | F | A | P | O | N | R | N | Y | L | V | V | Q | . | T | G |   |   |
|                 | <i>Co_ciner</i>    | BAK14423 | 3.2.1.55 | ...N | KTEG | N  | L  | V   | V   | I | S | F | T | D | W | A | Q | A | G | S | A | S | F | F | Y | L | D | D | Q | A | P | . | L | G | T | G | Y | R | A | A | P | Q | V | F | F | F | A | P | O | K | L | N | Y | L | V | V | Q | . | N | G |
|                 | <i>Ac_mirum</i>    | ACU37207 |          | ...T | NGY  | N  | L  | V   | V   | H | S | F | T | D | W | S | Q | A | A | S | A | P | H | F | L | D | R | S | G | . | I | G | T | G | Y | R | A | A | P | Q | V | F | F | F | A | P | O | R | L | N | Y | L | V | V | Q | . | T | G |   |   |
|                 | <i>St_bingc</i>    | ADI13053 |          | ...S | ASGY | N  | L  | V   | V   | L | N | F | S | T | D | W | S | Q | A | A | S | A | P | H | F | L | D | R | S | G | . | I | G | T | G | Y | R | A | A | P | Q | V | F | F | F | A | P | O | R | T | N | Y | L | V | V | Q | . | T | G |   |
|                 | <i>Cl_sacch</i>    | AGF55270 |          | ...D | KTKF | Q  | M  | G   | Y   | A | S | A | S | T | I | N | G | L | S | A | Q | H | K | L | N | L | N | G | . | N | G | T | G | S | Y | G | A | P | Q | V | F | F | F | M | S | K | O | M | N | Y | L | V | V | Q | . | I | G |   |   |   |
|                 | <i>So_cellu</i>    | AGP41089 |          | ...N | ASGW | Q  | M  | L   | Y   | S | A | T | T | M | E | G | F | R | I | A | P | H | I | V | L | S | R | I | G | . | E | S | F | C | A | P | E | L | F | F | F | E | P | H | N | L | N | Y | L | V | V | Q | . | D | G |   |   |   |   |   |
|                 | <i>Cl_cellu</i>    | ACL75596 |          | ...N | KSGW | Q  | M  | C   | F   | T | S | A | S | T | I | S | G | L | K | T | A | P | R | T | Y | M | S | K | I | G | . | E | S | F | C | A | P | E | L | F | F | F | E | P | O | K | L | N | Y | L | V | V | Q | . | D | G |   |   |   |   |
|                 | <i>Cl_cellu</i>    | ACL75590 |          | ...N | KSGW | Q  | M  | C   | F   | T | S | A | S | T | I | S | G | L | K | T | A | P | R | T | Y | M | S | K | I | G | . | E | S | F | C | A | P | E | L | F | F | F | E | P | O | K | L | N | Y | L | V | V | Q | . | D | G |   |   |   |   |
|                 | <i>CL_BNL1100</i>  | AEY65176 |          | ...N | KSGW | Q  | M  | C   | F   | T | S | A | S | T | I | A | G | L | K | T | A | P | R | T | Y | M | S | K | I | G | . | E | S | F | C | A | P | E | L | F | F | F | E | P | O | K | L | N | Y | L | V | V | Q | . | D | G |   |   |   |   |
|                 | <i>CL_BNL1100</i>  | AEY65171 |          | ...N | KSGW | Q  | M  | C   | F   | T | S | A | S | T | I | A | G | L | K | T | A | P | R | T | Y | M | S | K | I | G | . | E | S | F | C | A | P | E | L | F | F | F | E | P | O | K | L | N | Y | L | V | V | Q | . | D | G |   |   |   |   |
|                 | <i>Te_turne</i>    | ACR14088 |          | ...D | GNK  | S  | M  | I   | O   | I | T | . | L | D | N | L | . | A | Q | A | T | T | N | Y | O | P | F | S | P | N | T | . | G | S | S | A | V | A | P | Q | V | F | F | T | P | O | K | N | Y | L | V | V | Q | . | W | P |   |   |   |   |
|                 | <i>So_cellu</i>    | CAN98023 |          | ...D | TAGN | G  | W  | S   | V   | Y | L | N | F | T | D | F | S | Q | A | A | S | Q | O | H | H | M | A | N | W | . | T | G | G | T | V | A | P | Q | V | F | F | F | R | P | H | N | K | N | Y | L | V | V | Q | . | W | N |   |   |   |   |
|                 | <i>So_cellu</i>    | CAN98020 |          | ...D | TAGN | G  | W  | S   | V   | Y | L | N | F | T | D | F | S | Q | A | A | S | Q | O | H | H | M | A | N | W | . | T | G | G | T | V | A | P | Q | V | F | F | F | R | P | H | N | K | N | Y | L | V | V | Q | . | W | N |   |   |   |   |
|                 | <i>So_cellu</i>    | CAN98020 |          | ...D | TAGN | G  | W  | S   | V   | Y | L | N | F | T | D | F | S | Q | A | A | S | Q | O | H | H | M | A | N | W | . | T | G | G | T | V | A | P | Q | V | F | F | F | R | P | H | N | K | N | Y | L | V | V | Q | . | W | N |   |   |   |   |
|                 | <i>Te_japan</i>    | ACE85320 | 3.2.1.55 | ...D | TAYR | S  | M  | .   | Y   | T | S | F | T | D | W | T | A | Q | A | P | H | I | S | M | N | G | S | R | . | V | G | N | T | V | A | P | Q | V | F | F | F | R | P | H | N | K | N | Y | L | V | V | Q | . | W | A |   |   |   |   |   |
|                 | <i>Te_turne</i>    | ACR13064 |          | ...D | NGL  | S  | S  | G   | I   | . | Y | M | N | F | S | D | F | T | Q | A | S | A | T | O | N | Y | M | R | N | T | . | V | G | N | T | V | A | P | Q | V | F | F | T | P | O | N | R | N | Y | L | V | V | Q | . | W | G |   |   |   |   |
|                 | <i>So_cellu</i>    | CAN94755 |          | ...N | TAGN | .  | Q  | M   | T   | Y | L | N | F | T | D | F | S | Q | A | A | S | A | S | H | Y | L | D | R | T | . | G | F | S | G | Y | C | A | P | Q | V | F | F | F | R | P | O | N | K | N | Y | L | V | V | Q | . | S | Q |   |   |   |
|                 | <i>Op_terra</i>    | ACB73617 |          | ...D | TSGN | .  | S  | M   | T   | Y | L | S | F | R | T | W | A | E | A | S | A | A | R | P | Y | L | D | O | N | P | . | N | L | R | G | Y | H | C | A | P | Q | V | F | F | R | P | O | K | N | Y | L | V | V | Q | . | S | H |   |   |   |
|                 | <i>Op_terra</i>    | ACB76517 |          | ...D | TSGN | .  | S  | M   | T   | Y | L | S | F | R | T | W | A | E | A | S | A | A | R | P | Y | L | D | O | N | P | . | N | L | R | G | Y | H | C | A | P | Q | V | F | F | R | P | O | K | N | Y | L | V | V | Q | . | S | H |   |   |   |
|                 | <i>Am_medit</i>    | ADJ49532 |          | ...D | TSGA | .  | S  | V   | E   | Y | H | F | T | D | F | S | Q | A | A | S | Q | Y | H | L | S | D | N | P | N | L | G | H | R | Y | M | A | P | Q | V | F | F | A | P | O | K | N | Y | L | V | V | Q | . | O | G |   |   |   |   |   |   |
|                 | <i>Am_medit</i>    | AF081241 |          | ...D | TSGA | .  | S  | V   | E   | Y | H | F | T | D | F | S | Q | A | A | S | Q | Y | H | L | S | D | N | P | N | L | G | H | R | Y | M | A | P | Q | V | F | F | A | P | O | K | N | Y | L | V | V | Q | . | O | G |   |   |   |   |   |   |
|                 | <i>Le_macul</i>    | CBX95362 |          | ...K | EAGY | .  | S  | L   | V   | V | F | N | F | T | D | F | S | Q | A | A | N | R | A | P | F | F | L | D | Q | S | A | . | I | G | T | G | Y | R | A | A | P | Q | V | F | F | F | A | P | O | K | L | N | Y | L | V | V | Q | . | N | G |
|                 | <i>St_viola</i>    | AEK965   |          | ...N | TSGA | .  | S  | M   | A   | Y | T | S | F | T | D | F | S | Q | A | A | S | A | S | H | Y | L | D | R | T | . | G | F | S | G | Y | C | A | P | Q | V | F | F | F | R | P | O | N | K | N | Y | L | V | V | Q | . | T | G |   |   |   |
|                 | <i>Us_maydi</i>    | EAK85571 |          | ...D | STKY | G  | S  | M   | A   | F | S | P | F | K | H | W | A | D | M | A | T | A | T | Q | T | G | M | T | Q | A | . | V |   |   |   |   |   |   |   |   |   |   |   |   |   |   |   |   |   |   |   |   |   |   |   |   |   |   |   |   |



Structural characterization of GH62  $\alpha$ -L-arabinofuranosidases

|                 |                   | β12 →<br>→→→<br>→→→ |          | →<br>→→→<br>→→→ |   | β13 →<br>→→→<br>→→→ |   | →→→<br>→→→<br>→→→ |   | β14 →<br>→→→<br>→→→ |   |   |   |   |   |   |     |     |     |     |   |   |   |   |   |   |   |   |   |   |   |     |     |     |     |     |     |     |   |     |   |   |   |   |     |     |     |     |     |   |     |     |     |     |     |     |   |     |
|-----------------|-------------------|---------------------|----------|-----------------|---|---------------------|---|-------------------|---|---------------------|---|---|---|---|---|---|-----|-----|-----|-----|---|---|---|---|---|---|---|---|---|---|---|-----|-----|-----|-----|-----|-----|-----|---|-----|---|---|---|---|-----|-----|-----|-----|-----|---|-----|-----|-----|-----|-----|-----|---|-----|
|                 |                   | 170                 |          | 180             |   | 190                 |   | 200               |   | 210                 |   |   |   |   |   |   |     |     |     |     |   |   |   |   |   |   |   |   |   |   |   |     |     |     |     |     |     |     |   |     |   |   |   |   |     |     |     |     |     |   |     |     |     |     |     |     |   |     |
| <i>Us_maydi</i> | EAK85571          |                     |          |                 |   |                     |   |                   |   |                     |   |   |   |   |   |   |     |     |     |     |   |   |   |   |   |   |   |   |   |   |   |     |     |     |     |     |     |     |   |     |   |   |   |   |     |     |     |     |     |   |     |     |     |     |     |     |   |     |
| <i>Po_anser</i> | CAP62336          | 3.2.1.55            |          |                 |   |                     |   |                   |   |                     |   |   |   |   |   |   |     |     |     |     |   |   |   |   |   |   |   |   |   |   |   |     |     |     |     |     |     |     |   |     |   |   |   |   |     |     |     |     |     |   |     |     |     |     |     |     |   |     |
| 1               | <i>Po_anser</i>   | CAP62336            | 3.2.1.55 | SDDN            | G | Q                   | L | Y                 | R | S                   | E | T | S | I | L | E | F   | P   | N   | G   | M | S | D | P | V | T | A | M | Q | D | N | R   | N   | D   | ... | L   | F   | E   | A | A   | C | V | V | S | L   | ... | P   | D   | G   | K | ... |     |     |     |     |     |   |     |
|                 | <i>Am_medit</i>   | AEK42553            |          | SDDN            | G | H                   | L | Y                 | R | S                   | Q | T | S | V | A | N | F   | F   | E   | P   | N | G | M | S | D | P | V | I | A | A | Q | D   | A   | D   | R   | Y   | A   | ... | L | F   | E | A | S | N | V   | V   | K   | V   | ... | A | G   | A   | D   | Q   | ... |     |   |     |
|                 | <i>Am_medit</i>   | ADJ45772            |          | SDDN            | G | H                   | L | Y                 | R | S                   | Q | T | T | L | A | N | F   | F   | E   | P   | N | G | M | S | D | P | V | I | A | A | Q | D   | A   | D   | R   | Y   | A   | ... | L | F   | E | A | S | N | V   | V   | K   | V   | ... | A | G   | A   | D   | Q   | ... |     |   |     |
|                 | <i>Pi_indic</i>   | CCA78773            |          | SDDN            | G | H                   | L | Y                 | R | S                   | Q | T | T | L | A | N | F   | F   | E   | P   | N | G | M | S | D | P | V | I | A | A | Q | D   | A   | D   | R   | Y   | A   | ... | L | F   | E | A | S | N | V   | V   | K   | V   | ... | A | G   | A   | D   | Q   | ... |     |   |     |
|                 | <i>Pi_indic</i>   | CCA78772            |          | SDDN            | G | H                   | L | Y                 | R | S                   | Q | T | T | L | A | N | F   | F   | E   | P   | N | G | M | S | D | P | V | I | A | A | Q | D   | A   | D   | R   | Y   | A   | ... | L | F   | E | A | S | N | V   | V   | K   | V   | ... | A | G   | A   | D   | Q   | ... |     |   |     |
|                 | <i>Pi_indic</i>   | CCA78771            |          | SDDN            | G | H                   | L | Y                 | R | S                   | Q | T | T | L | A | N | F   | F   | E   | P   | N | G | M | S | D | P | V | I | A | A | Q | D   | A   | D   | R   | Y   | A   | ... | L | F   | E | A | S | N | V   | V   | K   | V   | ... | A | G   | A   | D   | Q   | ... |     |   |     |
|                 | <i>un</i>         | ACQ07729            |          | SDDN            | G | H                   | L | Y                 | R | S                   | Q | T | S | L | A | N | F   | F   | E   | P   | N | G | M | S | D | P | V | I | A | A | Q | D   | S   | N   | K   | N   | A   | ... | L | F   | E | A | S | N | V   | V   | H   | T   | ... | A | G   | N   | G   | E   | ... |     |   |     |
|                 | <i>un</i>         | ACQ05660            |          | SDDN            | G | H                   | L | Y                 | R | S                   | Q | T | S | L | A | N | F   | F   | E   | P   | N | G | M | S | D | P | V | I | A | A | Q | D   | S   | N   | P   | N   | N   | ... | L | F   | E | A | S | N | V   | V   | H   | T   | ... | A | G   | N   | G   | E   | ... |     |   |     |
|                 | <i>un</i>         | bacte               | AFY23018 | SDDN            | G | H                   | L | Y                 | R | A                   | Q | T | T | V | A | N | F   | F   | E   | P   | N | G | F | T | N | T | V | M | V | M | S | D   | S   | N   | K   | Y   | A   | ... | L | W   | E | A | S | N | V   | V   | K   | V   | ... | Q | G   | T   | A   | N   | Q   | ... |   |     |
|                 | <i>Co_ciner</i>   | BAK14423            | 3.2.1.55 | SDDN            | G | H                   | L | Y                 | R | S                   | Q | T | S | L | A | N | F   | F   | E   | P   | N | G | F | N | E | P | V | I | A | M | Q | D   | S   | N   | K   | N   | R   | ... | L | F   | E | A | A | N | V   | R   | I   | ... | D   | G | S   | N   | E   | ... |     |     |   |     |
|                 | <i>Ac_mirum</i>   | ACU37207            |          | SDDN            | G | H                   | L | Y                 | R | S                   | Q | T | S | L | A | N | F   | F   | E   | P   | N | G | F | T | N | T | V | I | A | M | Q | D   | S   | N   | R   | N   | R   | ... | L | F   | E | A | S | N | I   | V   | K   | V   | ... | A | G   | K   | N   | Q   | ... |     |   |     |
|                 | <i>St_bingc</i>   | ADI13053            |          | SDDN            | G | H                   | L | Y                 | R | S                   | Q | T | T | L | A | N | F   | F   | E   | P   | N | G | F | T | N | T | V | I | A | A | Q | D   | S   | N   | K   | Y   | A   | ... | L | F   | E | A | S | N | V   | V   | K   | V   | ... | Q | G   | S   | N   | Q   | ... |     |   |     |
|                 | <i>Cl_sacch</i>   | AGF55270            |          | TPSD            | G | S                   | H | N                 | I | Y                   | C | R | K | T | S | L | A   | N   | F   | F   | E | P | N | G | W | G | P | A | T | V | A | ... | V   | K   | D   | ... | T   | F   | E | G   | A | C | V | V | K   | S   | ... | K   | A   | D | N   | N   | ... |     |     |     |   |     |
|                 | <i>So_cellu</i>   | AGP41089            |          | TPDD            | G | S                   | R | R                 | L | Y                   | V | R | K | T | A | R | G   | S   | F   | F   | P | N | G | W | G | S | P | S | V | A | I | D   | ... | ... | ... | ... | ... | T   | F | E   | G | A | H | V | V   | K   | S   | ... | L   | A | D   | G   | Q   | ... |     |     |   |     |
|                 | <i>Cl_cellu</i>   | ACL75596            |          | TPSD            | G | S                   | G | K                 | L | Y                   | M | R | K | T | T | L | A   | N   | F   | F   | E | P | N | G | W | S | T | P | T | V | A | ... | ... | ... | ... | ... | ... | V   | F | E   | G | A | A | V | V   | K   | S   | ... | L   | A | D   | G   | Q   | ... |     |     |   |     |
|                 | <i>Cl_cellu</i>   | ACL75590            |          | TPSD            | G | S                   | G | K                 | L | Y                   | M | R | K | T | T | L | A   | N   | F   | F   | E | P | N | G | W | S | T | P | T | V | A | ... | ... | ... | ... | ... | ... | V   | F | E   | G | A | A | V | V   | K   | S   | ... | L   | A | D   | G   | Q   | ... |     |     |   |     |
|                 | <i>Cl_BNL1100</i> | AEY65176            |          | TPSD            | G | S                   | G | K                 | L | Y                   | M | R | K | T | A | L | A   | N   | F   | F   | E | P | N | G | W | S | T | P | T | V | S | ... | ... | ... | ... | ... | ... | V   | F | E   | A | A | V | V | K   | S   | ... | L   | A   | D | G   | Q   | ... |     |     |     |   |     |
|                 | <i>Cl_BNL1100</i> | AEY65171            |          | TPSD            | G | S                   | G | K                 | L | Y                   | M | R | K | T | A | L | A   | N   | F   | F   | E | P | N | G | W | S | T | P | T | V | S | ... | ... | ... | ... | ... | ... | V   | F | E   | A | A | V | V | K   | S   | ... | L   | A   | D | G   | Q   | ... |     |     |     |   |     |
|                 | <i>Te_turne</i>   | ACR14088            |          | FKDD            | G | K                   | M | Y                 | N | S                   | T | P | V | D | N | F | F   | E   | P   | N   | G | F | D | P | G | T | T | F | K | V | A | D   | I   | E   | D   | S   | G   | P   | T | ... | N | I | V | F | E   | A   | G   | N   | I   | K | T   | ... | K   | N   | S   | D   | Y | ... |
|                 | <i>So_cellu</i>   | CAN98023            |          | SRDD            | G | K                   | L | Y                 | R | S                   | K | V | S | I | D | K | F   | F   | A   | ... | F | D | G | Y | E | T | V | M | T | A | P | S   | A   | G   | L   | ... | L   | F   | E | A   | S | N | V | V | K   | V   | ... | D   | G   | T | N   | K   | ... |     |     |     |   |     |
|                 | <i>So_cellu</i>   | CAN98020            |          | SRDD            | G | K                   | L | Y                 | R | S                   | K | V | S | I | D | K | F   | F   | A   | ... | F | D | G | Y | E | T | V | M | S | A | P | S   | A   | G   | L   | ... | L   | F   | E | A   | S | N | V | V | K   | V   | ... | D   | G   | S | N   | K   | ... |     |     |     |   |     |
|                 | <i>Ce_japon</i>   | ACE85320            | 3.2.1.55 | SRDD            | G | V                   | L | Y                 | S | K                   | T | L | A | N | F | F | N   | ... | F   | S   | G | Y | T | V | M | E | D | H | R | G | N | G   | S   | Y   | ... | L   | F   | E   | A | A   | N | V | V | K | L   | ... | D   | G   | Q   | N | R   | ... |     |     |     |     |   |     |
|                 | <i>Te_turne</i>   | ACR13064            |          | SRDD            | G | T                   | L | Y                 | M | S                   | K | T | S | I | G | N | F   | F   | ... | F   | S | G | Y | T | T | V | M | S | G | A | Q | N   | V   | ... | L   | F   | E   | A   | A | N   | V | V | K | L | ... | K   | G   | T   | D   | Q | ... |     |     |     |     |     |   |     |
|                 | <i>So_cellu</i>   | CAN94755            |          | TGDD            | G | R                   | M | Y                 | S | Q                   | T | T | L | Q | N | F | F   | ... | F   | G   | F | P | V | S | I | A | L | Q | D | S | N | R   | N   | ... | L   | F   | E   | G   | S | S   | V | T | K | I | ... | K   | G   | M   | N   | K | ... |     |     |     |     |     |   |     |
|                 | <i>Op_terra</i>   | ACB73617            |          | SDDY            | G | R                   | F | Y                 | R | S                   | R | T | R | V | E | N | F   | F   | ... | F   | G | F | E | D | P | V | V | M | Q | D | A | N   | R   | F   | ... | L   | F   | E   | G | G   | C | V | T | R | ... | K   | G   | L   | N   | Q | ... |     |     |     |     |     |   |     |
|                 | <i>Op_terra</i>   | ACB76517            |          | SDDW            | G | R                   | F | Y                 | R | S                   | R | T | K | L | E | D | F   | F   | ... | F   | G | F | E | D | P | V | V | M | Q | D | A | N   | R   | F   | ... | L   | F   | E   | A | S   | C | I | V | R | ... | K   | G   | T   | N   | E | ... |     |     |     |     |     |   |     |
|                 | <i>Am_medit</i>   | ADJ49532            |          | ANDA            | G | D                   | I | F                 | R | S                   | Q | T | T | V | A | N | F   | F   | ... | F   | G | F | N | T | A | V | V | L | H | D | D | N   | R   | G   | ... | L   | F   | E   | A | T   | A | V | V | K | L   | ... | K   | G   | S   | T | S   | ... |     |     |     |     |   |     |
|                 | <i>Am_medit</i>   | AF081241            |          | ANDA            | G | D                   | I | F                 | R | S                   | Q | T | T | V | A | N | F   | F   | ... | F   | G | F | N | T | A | V | V | L | H | D | D | N   | R   | G   | ... | L   | F   | E   | A | T   | A | V | V | K | L   | ... | K   | G   | S   | T | S   | ... |     |     |     |     |   |     |
|                 | <i>Le_macul</i>   | CBX95362            |          | SDDN            | G | H                   | L | Y                 | R | S                   | Q | T | A | V | G | E | F   | F   | ... | G   | M | S | E | P | V | I | A | Q | D | K | N | D   | ... | ... | ... | ... | ... | L   | F | E   | A | A | T | V | V   | S   | V   | ... | G   | A | S   | S   | ... |     |     |     |   |     |
|                 | <i>St_viola</i>   | AEM84965            |          | SDDN            | G | H                   | L | F                 | R | S                   | E | T | T | V | G | E | F   | F   | ... | G   | F | R | N | T | Q | L | V | L | Q | D | S | K   | F   | A   | ... | L   | F   | E   | G | E   | A | V | V | R | ... | Q   | G   | T   | N   | T | ... |     |     |     |     |     |   |     |
|                 | <i>Us_maydi</i>   | EAK85571            |          | VADN            | G | K                   | V | Y                 | R | T                   | S | M | A | I | G | D | F   | F   | ... | F   | S | G | T | A | S | E | V | V | L | S | D | T   | Q   | A   | ... | L   | F   | E   | A | V   | Q | V | T | V | ... | A   | G   | Q   | N   | Q | ... |     |     |     |     |     |   |     |
|                 | <i>Sp_reil1</i>   | CB069122            |          | CGDN            | G | K                   | V | Y                 | H | S                   | K | M | A | I | G | S | F   | F   | ... | F   | S | G | T | A | S | E | V | V | L | S | D | T   | P   | O   | K   | ... | L   | F   | E | A   | V | Q | V | T | V   | ... | S   | G   | T   | N | Q   | ... |     |     |     |     |   |     |
|                 | <i>Po_anser</i>   | CAP65929            |          | AGDN            | G | R                   | I | Y                 | S | M                   | P | L | G | N | F | F | ... | N   | F   | G   | T | S | T | I | F | H | G | A | K | N | D | ... | ... | ... | ... | ... | L   | F   | E | A   | V | Q | V | T | L   | ... | K   | D   | S   | S | P   | T   | ... |     |     |     |   |     |
|                 | <i>Ma_oryza</i>   | EAA47906            |          | CGDN            | G | K                   | I | Y                 | R | S                   | T | M | P | L | G | N | F   | F   | ... | N   | F | G | T | S | T | I | F | H | G | A | K | N   | D   | ... | ... | ... | ... | ... | L | F   | E | A | V | Q | V   | T   |     |     |     |   |     |     |     |     |     |     |   |     |

Structural characterization of GH62  $\alpha$ -L-arabinofuranosidases

|                 |                 | β15      |          | β16   |    | β17 |     | β18  |     | β19 |   |   |   |   |   |   |   |   |   |   |   |   |   |   |   |   |   |   |   |   |   |   |   |   |   |   |   |   |   |   |   |   |   |   |   |   |   |   |   |   |   |
|-----------------|-----------------|----------|----------|-------|----|-----|-----|------|-----|-----|---|---|---|---|---|---|---|---|---|---|---|---|---|---|---|---|---|---|---|---|---|---|---|---|---|---|---|---|---|---|---|---|---|---|---|---|---|---|---|---|---|
|                 |                 | 220      |          | 230   |    | 240 |     | 250  |     | 260 |   |   |   |   |   |   |   |   |   |   |   |   |   |   |   |   |   |   |   |   |   |   |   |   |   |   |   |   |   |   |   |   |   |   |   |   |   |   |   |   |   |
| <i>Us maydi</i> | EAK85571        |          |          |       |    |     |     |      |     |     |   |   |   |   |   |   |   |   |   |   |   |   |   |   |   |   |   |   |   |   |   |   |   |   |   |   |   |   |   |   |   |   |   |   |   |   |   |   |   |   |   |
| <i>Po_anser</i> | CAP62336        | 3.2.1.55 |          |       |    |     |     |      |     |     |   |   |   |   |   |   |   |   |   |   |   |   |   |   |   |   |   |   |   |   |   |   |   |   |   |   |   |   |   |   |   |   |   |   |   |   |   |   |   |   |   |
| 1               | <i>Po_anser</i> | CAP62336 | 3.2.1.55 | YLLLV | AI | GT  | ... | DGH  | RM  | F   | R | S | W | T | A | D | S | I | R | G | P | W | O | G | L | A | N | . | T | E | Q | N | P | W | A | R | S | N | V | Q | F | D | G | D | V | W | T | K |   |   |   |
|                 | <i>Am_medit</i> | AEK42553 |          | YLLLV | AI | GA  | ... | QGG  | R   | F   | R | S | W | T | S | S | A | I | A | G | P | W | T | P | L | A | D | . | T | E | S | A | P | F | A | G | A | N | V | T | F | P | A | G | Q | . | W | T | T |   |   |
|                 | <i>Pi_indic</i> | CA70773  |          | YLLLV | AI | GS  | ... | NG   | R   | F   | R | S | W | R | S | S | L | T | G | S | W | T | P | L | A | A | . | T | E | S | A | P | F | A | G | A | N | V | T | F | P | A | G | Q | . | W | T | T |   |   |   |
|                 | <i>Pi_indic</i> | CCA70772 |          | YLLLV | AI | GS  | ... | NG   | R   | F   | R | S | W | K | S | S | L | T | G | S | W | T | P | L | A | A | . | T | E | S | T | P | F | A | G | K | N | V | D | F | . | P | G | G | R | . | W | T | N |   |   |
|                 | <i>Pi_indic</i> | CA70771  |          | YLLLV | AI | GS  | ... | NG   | R   | F   | R | S | W | K | S | S | L | T | G | S | W | T | P | L | A | A | . | T | E | A | N | P | F | A | G | K | N | V | D | F | . | P | G | G | R | . | W | T | N |   |   |
|                 | un ACQ07729     |          |          | YLLLV | AI | GS  | ... | DG   | R   | F   | R | S | W | T | S | S | L | T | G | S | W | T | P | L | A | A | . | T | E | A | N | P | F | A | R | S | N | V | V | F | . | S | G | T | A | . | W | T | K |   |   |
|                 | un ACQ05660     |          |          | YLLLV | AI | GS  | ... | DGN  | R   | F   | R | S | W | T | A | P | S | L | T | G | S | W | T | P | L | A | A | . | T | E | A | N | P | F | A | R | S | N | V | V | F | . | S | G | T | A | . | W | T | K |   |
|                 | un_bacte        | AFY23018 |          | YLLLV | AI | GS  | ... | NGK  | R   | F   | R | S | W | T | A | N | G | I | T | G | S | W | T | P | L | A | A | . | T | E | A | N | P | F | A | R | S | T | N | V | T | F | . | S | G | T | A | . | W | T | K |
|                 | Co_ciner        | BAK14423 | 3.2.1.55 | YLLLV | AI | GS  | ... | DGR  | R   | F   | R | S | W | T | S | I | A | G | P | W | T | P | L | A | D | . | Q | E | S | N | P | F | A | R | A | N | V | V | F | . | T | G | N | A | . | W | T | K |   |   |   |
|                 | Ac_mirum        | ACU37207 |          | YLLLV | AI | GS  | ... | DGR  | R   | F   | R | S | W | T | A | P | A | I | A | G | P | W | T | P | L | A | D | . | S | E | S | N | P | F | A | R | A | N | V | T | F | . | P | G | G | Q | . | W | T | K |   |
|                 | St_bingc        | ADT13053 |          | YLLLV | AI | GS  | ... | DGR  | R   | F   | R | S | W | T | S | S | I | G | S | W | T | P | L | A | A | . | S | E | S | N | P | F | A | R | A | N | V | T | F | . | P | S | G | A | . | W | T | K |   |   |   |
|                 | So_cellu        | AGP41089 |          | YMLLV | DM | ... |     | KDN  | R   | F   | R | Y | E | L | H | O | A | S | S | L | G | S | W | T | P | L | A | . | K | W | A | R | S | N | V | T | F | . | P | S | G | A | . | W | T | K |   |   |   |   |   |
|                 | So_cellu        | AGP41089 |          | YMLLV | DM | ... |     | KDN  | R   | F   | R | Y | E | L | H | O | A | S | S | L | G | S | W | T | P | L | A | . | K | W | A | R | S | N | V | T | F | . | P | S | G | A | . | W | T | K |   |   |   |   |   |
|                 | CL_cellu        | ACL75596 |          | YMLLV | DM | ... |     | IDG  | R   | F   | R | S | Y | E | L | F | T | S | S | A | G | S | W | T | P | L | A | . | K | W | A | R | S | N | V | T | F | . | P | S | G | A | . | W | T | K |   |   |   |   |   |
|                 | CL_cellu        | ACL75596 |          | YMLLV | DM | ... |     | IDG  | R   | F   | R | S | Y | E | L | F | T | S | S | A | G | S | W | T | P | L | A | . | K | W | A | R | S | N | V | T | F | . | P | S | G | A | . | W | T | K |   |   |   |   |   |
|                 | CL_BNL1108      | AEV63176 |          | YMLLV | DM | ... |     | IDG  | R   | F   | R | S | Y | E | L | F | T | S | S | A | G | S | W | T | P | L | A | . | K | W | A | R | S | N | V | T | F | . | P | S | G | A | . | W | T | K |   |   |   |   |   |
|                 | CL_BNL1108      | AEV63176 |          | YMLLV | DM | ... |     | IDG  | R   | F   | R | S | Y | E | L | F | T | S | S | A | G | S | W | T | P | L | A | . | K | W | A | R | S | N | V | T | F | . | P | S | G | A | . | W | T | K |   |   |   |   |   |
|                 | Te_turne        | ACR14088 |          | YLLQV | EW | GET | ... | ESRR | L   | R   | S | Y | L | S | T | S | L | D | G | P | W | I | A | H | H | . | D | E | S | A | P | F | A | G | P | E | N | T | T | F | . | N | G | P | A | . | W | T | K |   |   |
|                 | So_cellu        | CAN98023 |          | YLLLV | AF | .   | D   | NSP  | R   | F   | R | S | W | T | S | E | S | I | D | G | P | W | A | P | L | A | . | T | K | O | K | P | F | A | G | P | A | N | V | T | F | . | E | G | G | . | W | T | K |   |   |
|                 | So_cellu        | CAN98020 |          | YLLMV | AY | .   | D   | NSP  | R   | F   | R | S | W | T | S | E | S | I | D | G | P | W | A | P | L | A | . | T | K | O | K | P | F | A | G | P | A | N | V | T | F | . | E | G | O | . | W | T | K |   |   |
|                 | Te_japon        | ACE85320 | 3.2.1.55 | YLLMV | AY | .   | I   | SGP  | R   | F   | R | S | W | T | A | T | S | L | D | G | P | W | T | P | L | A | D | . | T | E | A | N | P | F | A | G | N | V | V | E | S | T | . | G | K | . | W | T | K |   |   |
|                 | Ce_turne        | ACR13064 |          | YLLLV | GW | QS  | ... | GPR  | F   | F   | R | A | W | T | S | N | S | L | D | G | P | W | T | A | Y | K | T | . | S | E | S | N | P | F | A | G | N | V | V | E | S | T | . | G | K | . | W | T | K |   |   |
|                 | So_cellu        | CAN94755 |          | YLLLV | AI | GP  | ... | TGAR | F   | R   | F | Y | S | F | T | A | D | R | L | D | G | P | W | T | P | L | A | H | . | T | N | A | P | F | A | G | N | V | V | T | A | P | G | V | A | D | . | W | T | K |   |
|                 | Op_terra        | ACB73617 |          | YLCFI | CI | G   | GP  | ...  | TGK | R   | F | R | A | F | T | A | D | R | L | D | G | P | W | T | P | L | A | Q | A | N | S | W | D | T | P | F | A | G | P | N | V | T | A | D | . | W | T | K |   |   |   |
|                 | Op_terra        | ACB73617 |          | YLCFI | CI | G   | GP  | ...  | TGK | R   | F | R | A | F | T | A | D | R | L | D | G | P | W | T | P | L | A | Q | A | N | S | W | D | T | P | F | A | G | P | N | V | T | A | D | . | W | T | K |   |   |   |
|                 | Am_medit        | ADJ49532 |          | YMLLV | GW | DS  | ... | VGH  | R   | V   | Y | R | A | W | T | A | P | S | L | G | S | W | T | P | L | A | . | P | F | A | G | L | A | N | V | T | F | . | P | S | G | A | . | W | T | K |   |   |   |   |   |
|                 | Am_medit        | AF081241 |          | YMLLV | GW | DS  | ... | VGH  | R   | V   | Y | R | A | W | T | A | P | S | L | G | S | W | T | P | L | A | . | P | F | A | G | L | A | N | V | T | F | . | P | S | G | A | . | W | T | K |   |   |   |   |   |
|                 | Le_macul        | CBX95362 |          | YLLLV | CI | G   | AG  | SP   | G   | G   | R | F | R | S | W | T | S | N | S | L | G | S | W | A | P | L | A | . | T | Q | N | P | F | A | G | N | V | V | E | S | T | . | G | K | . | W | T | K |   |   |   |
|                 | St_viola        | AEH84965 |          | YLLMV | AI | GS  | ... | DGR  | R   | F   | R | S | F | T | A | Q | L | D | G | P | W | Q | P | L | A | . | T | E | S | N | P | F | A | G | N | V | V | E | S | T | . | G | K | . | W | T | K |   |   |   |   |
|                 | Us_maydi        | EAK85571 |          | YMLLV | AI | GT  | ... | NG   | R   | F   | R | S | F | T | A | S | L | D | G | P | W | K | P | V | Q | A | . | S | E | S | A | P | F | A | G | K | N | V | D | F | . | P | G | G | R | . | W | T | N |   |   |
|                 | Sp_reli         | CB069122 |          | YLMIV | AI | GS  | ... | NG   | R   | F   | R | S | F | T | A | S | L | D | G | P | W | T | P | L | A | A | . | S | E | S | A | P | F | A | G | K | N | V | D | F | . | P | G | G | R | . | W | T | N |   |   |
|                 | Po_anser        | CAP65929 |          | YLMIV | AI | GS  | ... | NG   | R   | F   | R | S | F | T | A | S | L | D | G | P | W | T | P | L | A | A | . | S | E | S | A | P | F | A | G | K | N | V | D | F | . | P | G | G | R | . | W | T | N |   |   |
|                 | Ma_oryza        | EAA47906 |          | YLMIV | AI | GS  | ... | NG   | R   | F   | R | S | F | T | A | S | L | D | G | P | W | T | P | L | A | A | . | T | O | N | D | P | F | A | G | K | N | V | D | F | . | P | G | G | R | . | W | T | N |   |   |
|                 | Ma_oryza        | EAA57262 |          | YLMIV | AI | GS  | ... | NG   | R   | F   | R | S | F | T | A | S | L | D | G | P | W | T | P | L | A | A | . | T | O | N | D | P | F | A | G | K | N | V | D | F | . | P | G | G | R | . | W | T | N |   |   |
|                 | Tr_aesti        | ABT18331 |          | YLMIV | AI | GS  | ... | NG   | R   | F   | R | S | F | T | A | S | L | D | G | P | W | T | P | L | A | A | . | T | E | S | N | P | F | A | G | K | N | V | D | F | . | P | G | G | R | . | W | T | N |   |   |
|                 | Fu_grami        | AAV66346 |          | YMLLV | AI | GS  | ... | NG   | R   | F   | R | S | F | T | A | S | L | D | G | P | W | T | P | L | A | A | . | S | E | S | S | P | F | A | G | K | N | V | D | F | . | P | G | G | R | . | W | T | N |   |   |
|                 | My_therm        | AE060934 |          | YLMIV | AI | GS  | ... | NG   | R   | F   | R | S | F | T | A | S | L | D | G | P | W | T | P | L | A | A | . | S | E | S | O | P | F | A | G | K | N | V | D | F | . | P | G | G | R | . | W | T | N |   |   |
|                 | As_niger        | CAA03159 |          | YLMIV | AI | GS  | ... | TGH  | R   | F   | R | S | F | T | A | S | L | D | G | P | W | T | P | L | A | A | . |   |   |   |   |   |   |   |   |   |   |   |   |   |   |   |   |   |   |   |   |   |   |   |   |
